# Supplementary material
Source: PubMed Central journal article supplement (PMC5369574)
Supplement: flgastro-2014-100482-s1.pdf [file flgastro-2014-100482-s1.pdf]

## Appendix 1

Special Cause Variation: A number of rules were selected 'a priori'

- 1 data point beyond the upper and lower control limits
- 6 ascending consecutive data points
- 6 descending consecutive data points
- 8 consecutive data points above the centreline
- 8 consecutive data points below the centreline
- 2 out of 3 consecutive data points above +2 sigma
- 2 out of 3 consecutive data points below -2 sigma
- 15 consecutive data points within  $\pm 1$  sigma
